# Supplementary material for: Detergent-induced quantitatively limited formation of diacyl phosphatidylinositol dimannoside in Mycobacterium smegmatis
Source: PubMed Central journal article supplement (PMC11269278; doi:10.1016/j.jlr.2024.100533), 2024-03-24
Supplement: mmc1.pdf [file mmc1.pdf]

# Supplemental Data

**A**

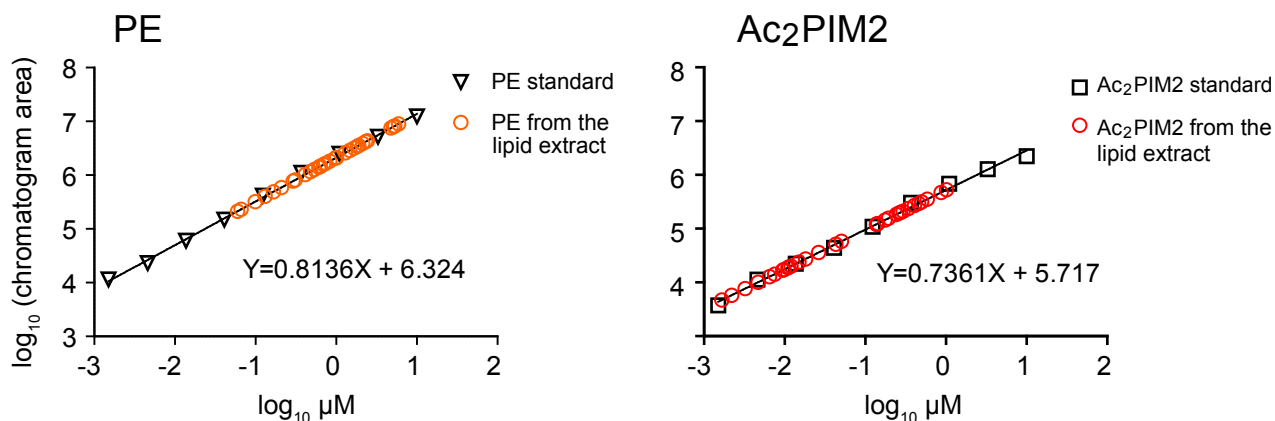

**B**

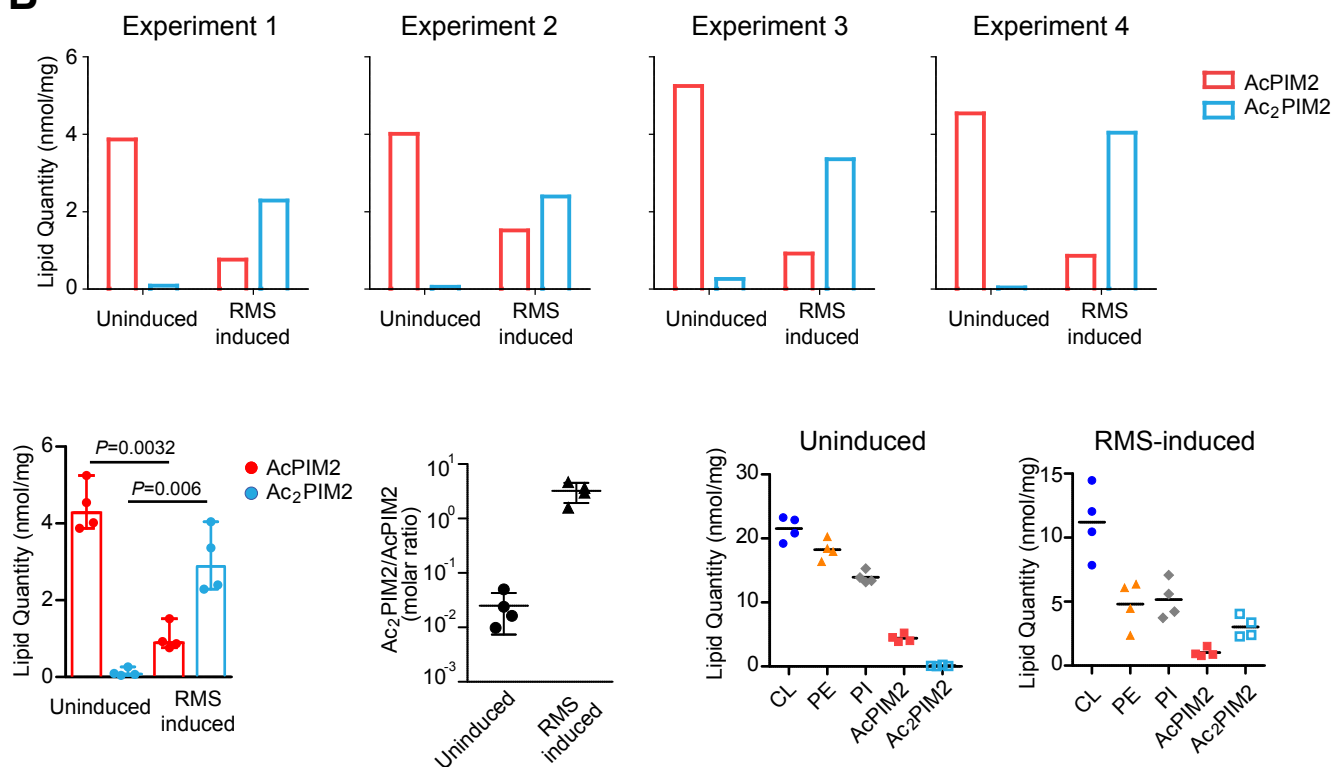

**Supplemental Figure S1. Verification of nonlinear standard curve fitting.** (A) The non-linear standard curves of PE and Ac<sub>2</sub>PIM2 in Figure 7C were plotted as logarithmic scale for both x- and y-coordinates. The converted standard curves PE (black triangle) and Ac<sub>2</sub>PIM2 (black square) were fitted with linear equations as indicated, which were used to calculate PE (orange circle) or Ac<sub>2</sub>PIM2 (red circle) concentrations in the extracted lipids. (B) The estimated lipid quantities using the linear curve fitting were comparable with the results obtained by the non-linear curve fitting in Figure 7E-H.
